# Supplementary material
Source: publisher figshare collection journal article supplement (https://acs.figshare.com/ndownloader/files/4570285)
Supplement: Supplementary file 1 [file 4570285]

## **Supplementary materials**

### **Piezoelectric nanogenerator using p-type ZnO nanowire arrays**

Ming-Pei Lu<sup>1</sup>, Jinhui Song<sup>2</sup>, Ming-Yen Lu<sup>2,3</sup>, Min-Teng Chen<sup>3</sup>, Yifan Gao<sup>2</sup>,  
Lih-Juann Chen<sup>3</sup>, and Zhong Lin Wang<sup>2, \*</sup>

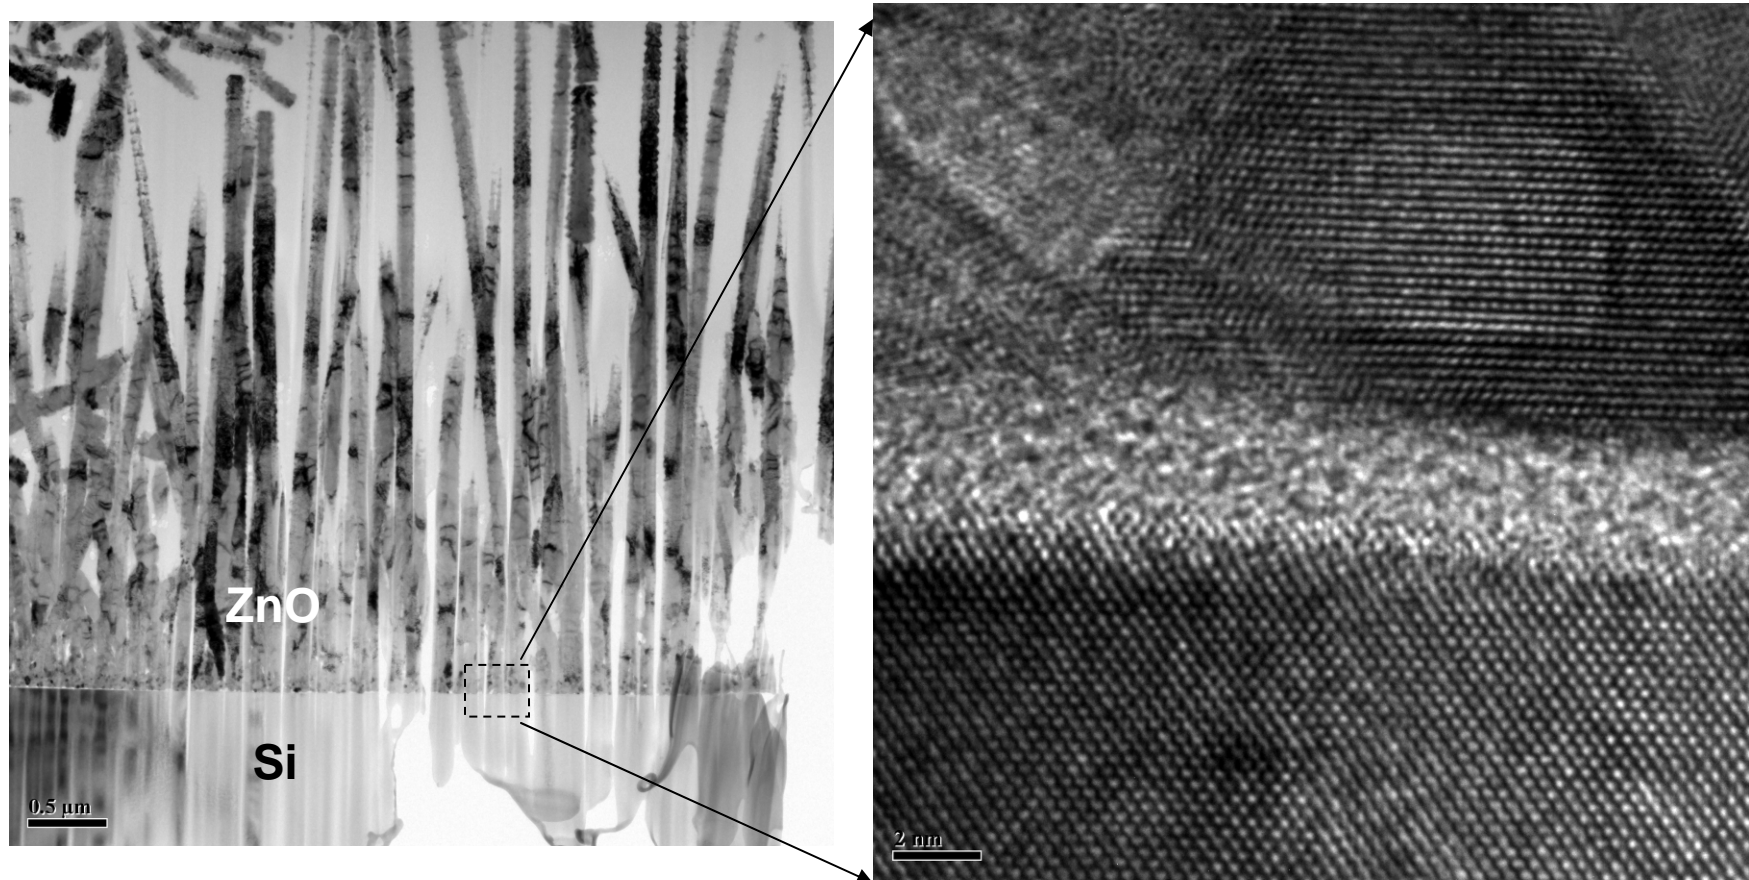

Fig. S1: TEM of the interface between the p-type NWs and the Si(001) substrate. Although a thin oxide layer is present at the interface, the orientation relationship between the two preserves:

$$\text{Si}(001) \parallel \text{ZnO}(0001), \text{Si}[1\bar{1}2] \parallel \text{ZnO}[01\bar{1}0], \text{Si}[110] \parallel \text{ZnO}[2\bar{1}\bar{1}0]$$

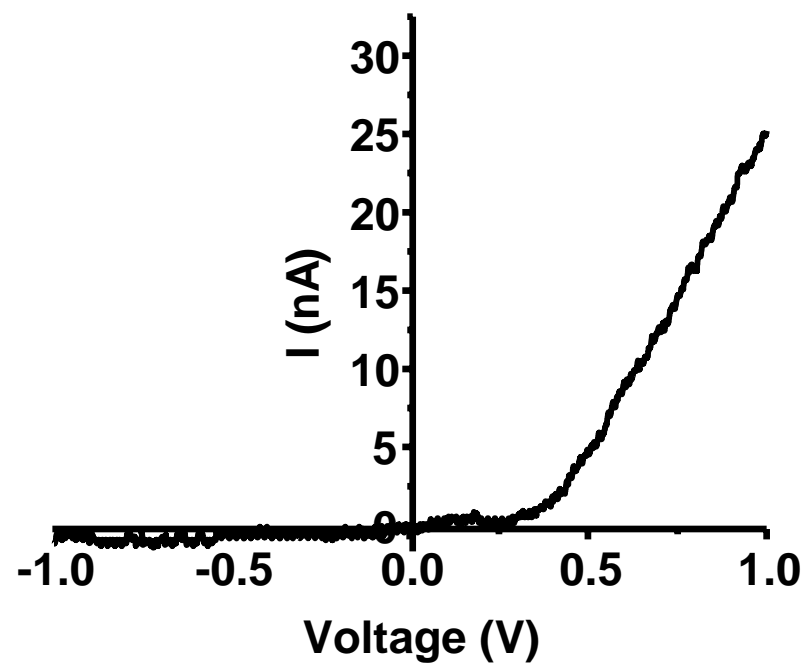

Fig. S1: Transport measurement between the AFM tip Si/Pt and the p-type NWs, showing the presence of a Schottky barrier.

## Calculation of the piezoelectric potential distribution in a p-type nanowire with finite doping

In order to calculate the piezoelectric potential in a bent semiconductive nanowire, we only need to consider the direct piezoelectric effect:

$$\begin{cases} \sigma_p = c_{pq} \varepsilon_q \\ D_i = e_{iq} \varepsilon_q + \kappa_{ik} E_k \end{cases} \quad (1)$$

where  $\sigma$  is the stress tensor,  $\varepsilon$  is the strain,  $\vec{E}$  is the electric field, and  $\vec{D}$  is the electric displacement.  $\kappa_{ik}$  is the dielectric constant,  $e_{kp}$  is the piezoelectric constant, and  $c_{pq}$  is the mechanical stiffness tensor. Substituting the second equation into the Gauss's law, we get the equation for the electric field:

$$\nabla \cdot \vec{D} = \frac{\partial}{\partial x_i} (e_{iq} \varepsilon_q + \kappa_{ik} E_k) = \rho_e^{(b)} = ep - en + eN_D^+ - eN_A^- \quad (2)$$

where  $p$  is the hole concentration in the valance band,  $n$  is the electron concentration in the conduction band,  $N_D^+$  is the ionized donor concentration, and  $N_A^-$  is the ionized acceptor concentration. For p-type ZnO NWs, we have  $n = N_D^+ = 0$ . By introducing

$$\vec{D}^R = e_{kp} \varepsilon_q \hat{i}_k \quad (3.1)$$

as the polarization due to piezoelectricity and

$$\rho^R = -\nabla \cdot \vec{D}^R \quad (3.2)$$

as the corresponding piezoelectric charge, equation 2 can be rewritten for the electric potential  $\varphi$ :

$$\kappa_{ik} \frac{\partial^2}{\partial x_i \partial x_k} \varphi = -(\rho^R + ep - eN_A^-) \quad (4)$$

The surface charge due to piezoelectricity is calculated by  $\Sigma^R = -\vec{n} \cdot \Delta \vec{D}^R$ , where  $\Delta \vec{D}^R$  is the change of  $\vec{D}^R$  astride the material surface and  $\vec{n}$  is the normal to the surface. For simplicity, we have ignored the surface charges introduced by polar surfaces of ZnO.

The redistribution of holes under thermal equilibrium is given by the Fermi-Dirac statistics:

$$p = N_v F_{1/2}(\eta), \quad \eta = \frac{E_v(\vec{x}) - E_F}{kT} \quad (5.1)$$

$$N_v = 2 \left( \frac{2\pi m_h kT}{h^2} \right)^{\frac{3}{2}} \quad (5.2)$$

where the valance band edge  $E_v(\vec{x})$  is a function of space coordinates.  $N_v$ , the effective state density of valance band, is determined by the effective mass of holes  $m_h = (m_{h,A}^{3/2} + m_{h,B}^{3/2})^{2/3}$  and the temperature  $T$ . Here  $m_{h,A} = m_{h,B} = 0.59m_e$ ,  $c\Gamma_7$  band is deep beneath and not considered. Although the fine structure of the valance band at the  $\Gamma$  point is not completely unified in the literature [1], the ignorance of the  $c\Gamma_7$  band will not affect our qualitative discussion.

Due to the large strain, the deformation potential might be important. To be specific, the band edge shift  $\Delta E_v$  is the sum of the electro-static energy part and the deformation potential part:

$$E_v - E_{v_0} = \Delta E_v = -e\varphi + \Delta E_v^{deform} = -e\varphi + a_v \frac{\Delta V}{V} \quad (6)$$

where  $E_{v_0}$  is the valance band edge of a free-standing un-deformed semiconductor material;  $\Delta E_v^{deform} = a_v \Delta V / V$  is the band edge shift due to the deformation potential, which is proportional to the relative volume change  $\Delta V / V$ , and  $a_v$  is the deformation potential constant. Finally, the activation process of the acceptors is given by:

$$N_A^+ = N_A \frac{1}{1 + g \exp(\frac{E_A - E_F}{kT})} = N_A \frac{1}{1 + g \exp(\eta + \frac{\Delta E_A}{kT})} \quad (7)$$

where  $E_A(\vec{x}) = E_v(\vec{x}) + \Delta E_A$  is the position-dependent acceptor energy level. The constant  $\Delta E_A$  is the activation energy of the acceptors.  $N_A$  is the concentration of the acceptors.  $g=4$  is assumed degeneracy factor for acceptor levels, which is good enough for qualitatively understanding the phenomenon.

The parameters used are: Young's modulus  $E = 129.0$  GPa and Poisson ratio  $\nu = 0.349$ ; relative dielectric constants  $\kappa_{\perp}^r = 7.77$ ,  $\kappa_{\parallel}^r = 8.91$ , and the piezoelectric constants  $e_{31} = -0.51 C/m^2$ ,  $e_{33} = 1.22 C/m^2$ ,  $e_{15} = -0.45 C/m^2$ . Effective mass is  $m_{h,A} = m_{h,B} = 0.59m_e$ , and deformation potential constant is  $a_v = -2.13 eV$ . The activation energy of acceptors is:  $\Delta E_A = 130 meV$  [1]. The nanowire is geometrically approximated as a cylinder, with radius  $a = 25$  nm, and length  $l = 600$  nm. The external force is  $\vec{f} = f_y \vec{e}_y$ ,  $f_y = 80 nN$ , uniformly applied at the top surface of the nanowire in a direction  $\vec{e}_y$  perpendicular to the nanowire axis.

1. Klingshirn, C. *Chemphyschem* **2007**, 8, (6), 782-803.
2. Gao, Y.; Wang, Z. L. *Nano Lett* **2007**, 7, (8), 2499-2505.
3. Shan, W.; Walukiewicz, W.; Ager, J. W.; Yu, K. M.; Zhang, Y.; Mao, S. S.; Kling, R.; Kirchner, C.; Waag, A. *Appl Phys Lett* **2005**, 86, (15), 153117.
